# Supplementary material
Source: publisher figshare collection journal article supplement (https://acs.figshare.com/ndownloader/files/28280733)
Supplement: Supplementary file 1 [file 28280733]

## Supporting Information

**Effect of Methylene Chain Length on the Thermodynamic Properties, Ferroelastic Properties, and Molecular Dynamics of Perovskite-Type Layer Crystal  $[\text{NH}_3(\text{CH}_2)_n\text{NH}_3]\text{MnCl}_4$  ( $n = 2, 3$ , and  $4$ )**

**Seon Ju Lee<sup>a</sup>, Moon Young Choi<sup>a</sup>, Ae Ran Lim<sup>a, b, \*</sup>**

*<sup>a</sup>Department of Carbon Convergence Engineering, Jeonju University, Jeonju 55069, Korea*

*<sup>b</sup>Analytical Laboratory of Advanced Ferroelectric Crystals, and Department of Science Education, Jeonju University, Jeonju 55069, Korea*

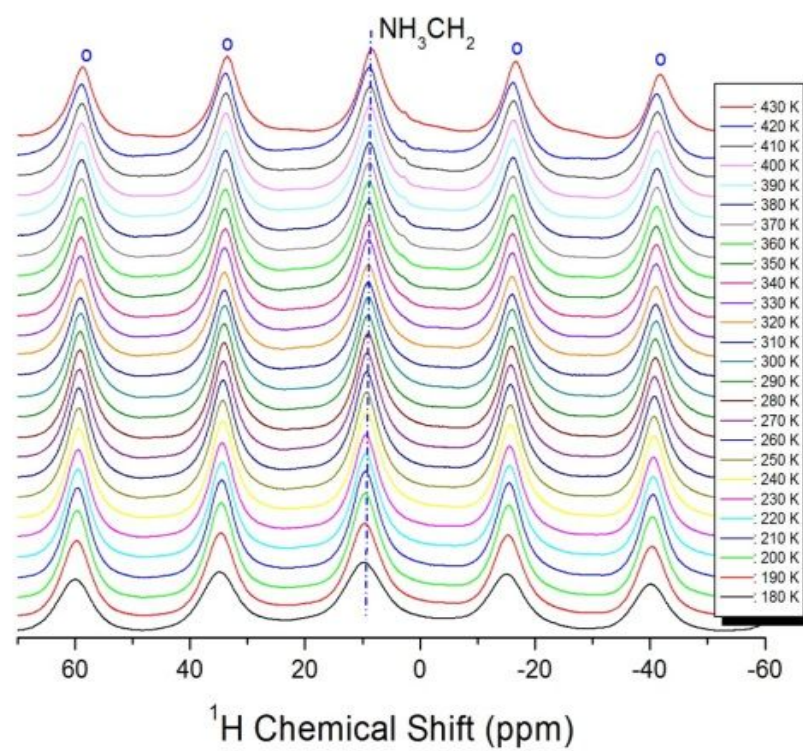

**Figure S1:**  $^1\text{H}$  chemical shifts of  $[\text{NH}_3(\text{CH}_2)_2\text{NH}_3]\text{MnCl}_4$  as a function of temperature.

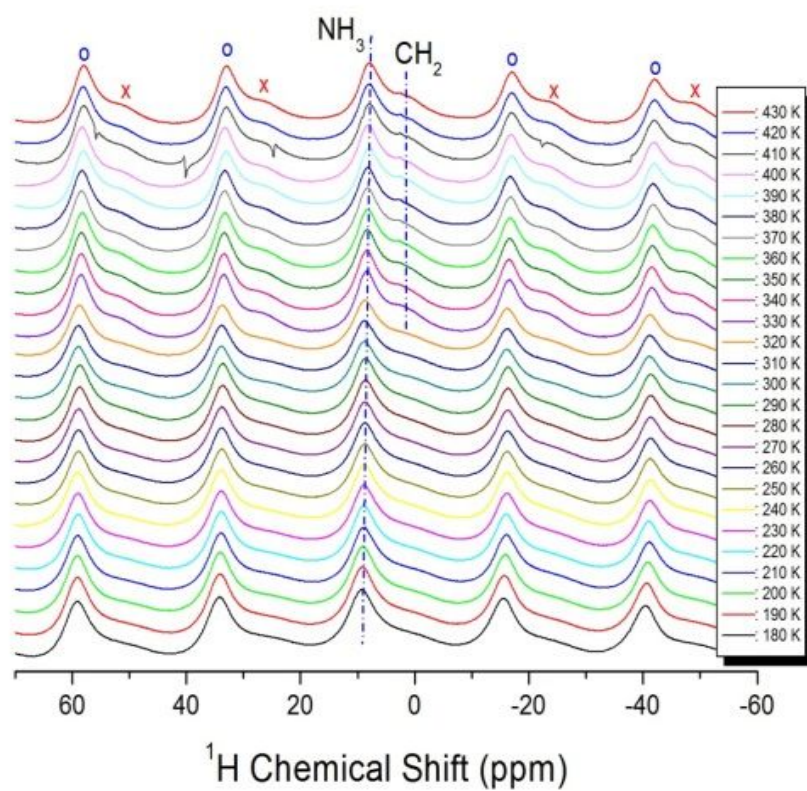

**Figure S2:**  $^1\text{H}$  chemical shifts of  $[\text{NH}_3(\text{CH}_2)_3\text{NH}_3]\text{MnCl}_4$  as a function of temperature.

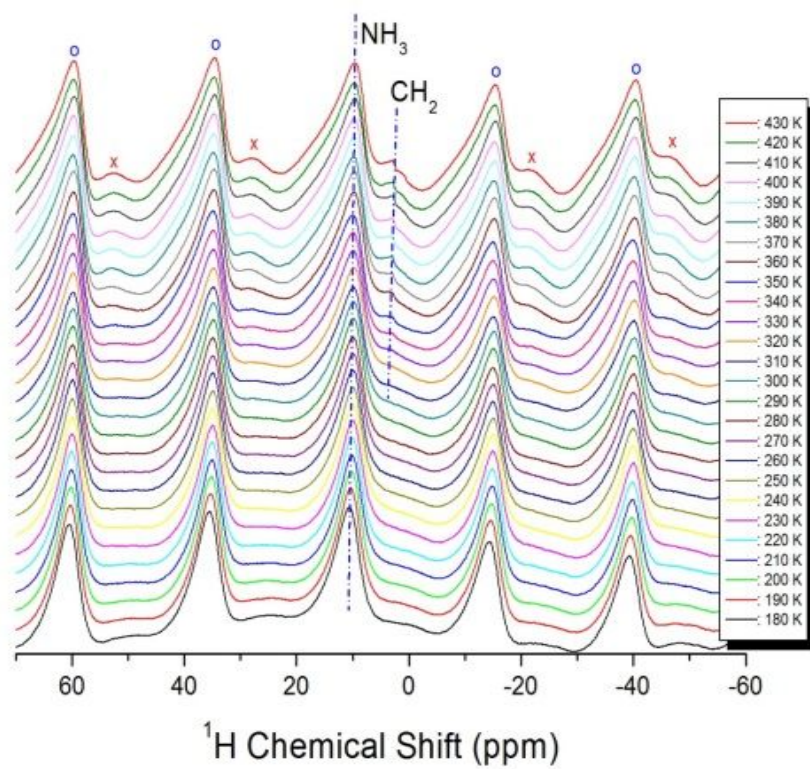

**Figure S3:**  $^1\text{H}$  chemical shifts of  $[\text{NH}_3(\text{CH}_2)_4\text{NH}_3]\text{MnCl}_4$  as a function of temperature.

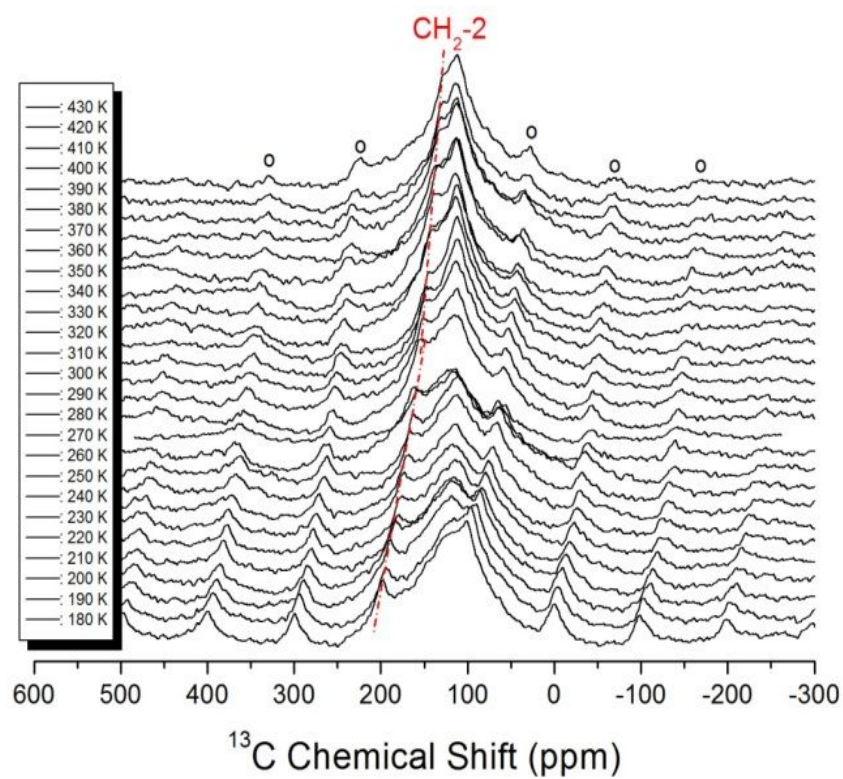

**Figure S4:**  $^{13}\text{C}$  chemical shifts of  $[\text{NH}_3(\text{CH}_2)_2\text{NH}_3]\text{MnCl}_4$  as a function of temperature.

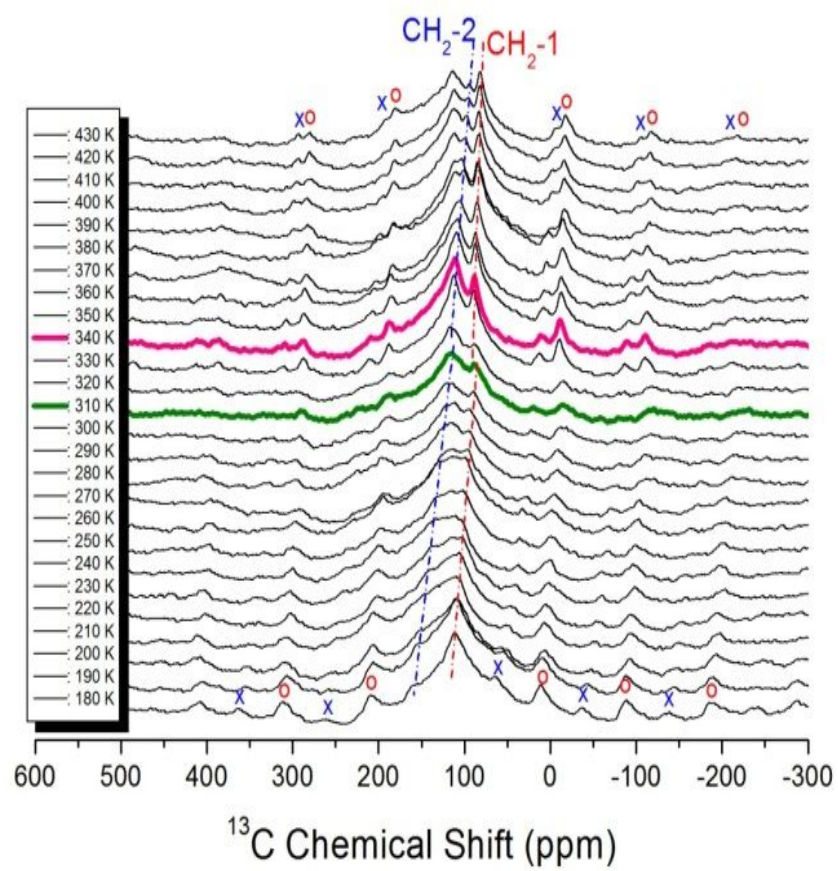

**Figure S5:**  $^{13}\text{C}$  chemical shifts of  $[\text{NH}_3(\text{CH}_2)_3\text{NH}_3]\text{MnCl}_4$  as a function of temperature.



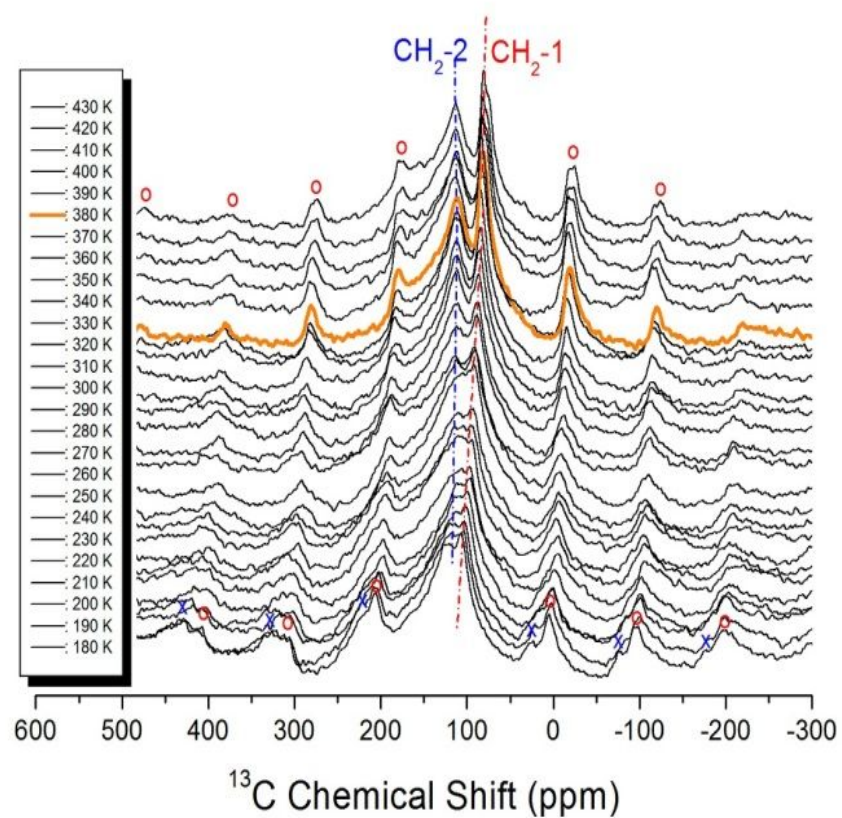

**Figure S6:**  $^{13}\text{C}$  chemical shifts of  $[\text{NH}_3(\text{CH}_2)_4\text{NH}_3]\text{MnCl}_4$  as a function of temperature.
